# Supplementary material
Source: HighWire-hosted journal article supplement (https://www.jrheum.org/highwire/filestream/42145/field_highwire_adjunct_files/0/220049DataSuppl.pdf)
Supplement: 220049DataSuppl.pdf [file 220049DataSuppl.pdf]

## **SUPPLEMENTARY MATERIALS**

### **Mammalian Target of Rapamycin Pathway Assessment in Antiphospholipid Antibody Positive Patients with**

#### **Livedo**

Sevim *et al.*

| <b>Supplementary Table S1. Demographic and Clinical Characteristics of Patients with Livedo Reticularis</b>                                                                                                                                                                                                                                                                                                                                                                                                                                                                               |            |                              |                            |                                                                   |                         |                         |                                |
|-------------------------------------------------------------------------------------------------------------------------------------------------------------------------------------------------------------------------------------------------------------------------------------------------------------------------------------------------------------------------------------------------------------------------------------------------------------------------------------------------------------------------------------------------------------------------------------------|------------|------------------------------|----------------------------|-------------------------------------------------------------------|-------------------------|-------------------------|--------------------------------|
| <b>Gender</b>                                                                                                                                                                                                                                                                                                                                                                                                                                                                                                                                                                             | <b>Age</b> | <b>History of Thrombosis</b> | <b>Pregnancy Morbidity</b> | <b>Non-Criteria Manifestations</b>                                | <b>aPL Profile</b>      | <b>Skin Biopsy Site</b> | <b>Medications</b>             |
| <b>Antiphospholipid Antibody Positive, without SLE</b>                                                                                                                                                                                                                                                                                                                                                                                                                                                                                                                                    |            |                              |                            |                                                                   |                         |                         |                                |
| F                                                                                                                                                                                                                                                                                                                                                                                                                                                                                                                                                                                         | 71         | No                           | No                         | No                                                                | LA                      | Left thigh              | Nifedipine                     |
| M                                                                                                                                                                                                                                                                                                                                                                                                                                                                                                                                                                                         | 57         | Yes                          | N/A                        | No                                                                | aCL and a $\beta_2$ GPI | Right thigh             | Aspirin<br>Enoxaparin<br>HCQ   |
| F                                                                                                                                                                                                                                                                                                                                                                                                                                                                                                                                                                                         | 36         | Yes                          | No                         | AIHA                                                              | Triple positive         | Left arm                | -                              |
| F                                                                                                                                                                                                                                                                                                                                                                                                                                                                                                                                                                                         | 55         | Yes                          | No                         | Cognitive dysfunction                                             | aCL and a $\beta_2$ GPI | Right arm               | Enoxaparin                     |
| <b>Antiphospholipid Antibody Positive, with SLE</b>                                                                                                                                                                                                                                                                                                                                                                                                                                                                                                                                       |            |                              |                            |                                                                   |                         |                         |                                |
| F                                                                                                                                                                                                                                                                                                                                                                                                                                                                                                                                                                                         | 42         | Yes*                         | N/A                        | No                                                                | LA                      | Right calf              | Enoxaparin<br>HCQ              |
| F                                                                                                                                                                                                                                                                                                                                                                                                                                                                                                                                                                                         | 40         | Yes                          | No                         | No                                                                | LA                      | Left arm                | Aspirin<br>Enoxaparin<br>HCQ** |
| F                                                                                                                                                                                                                                                                                                                                                                                                                                                                                                                                                                                         | 54         | Yes                          | Yes                        | Thrombocytopenia<br>Cognitive dysfunction<br>White matter lesions | Triple positive         | Left thigh              | Aspirin<br>Warfarin<br>HCQ     |
| F                                                                                                                                                                                                                                                                                                                                                                                                                                                                                                                                                                                         | 30         | No                           | N/A                        | No                                                                | LA                      | Left forearm            | HCQ                            |
| <b>Antiphospholipid Antibody Negative, SLE</b>                                                                                                                                                                                                                                                                                                                                                                                                                                                                                                                                            |            |                              |                            |                                                                   |                         |                         |                                |
| F                                                                                                                                                                                                                                                                                                                                                                                                                                                                                                                                                                                         | 26         | N/A                          | No                         | No                                                                | N/A                     | Left forearm            | HCQ                            |
| F                                                                                                                                                                                                                                                                                                                                                                                                                                                                                                                                                                                         | 43         | N/A                          | No                         | No                                                                | N/A                     | Left arm                | HCQ                            |
| Non-criteria manifestations: Thrombocytopenia (platelet count <100.000/ $\mu$ L), AIHA (Autoimmune Hemolytic Anemia), Cardiac Valve Disease, aPL-associated nephropathy, Neurological Findings (Cognitive Dysfunction, Multiple Sclerosis-like Disease, Chorea, Seizure Disorder, White Matter Lesions); aPL: Antiphospholipid; SLE: Systemic Lupus Erythematosus; LA: Lupus Anticoagulant; aCL: Anticardiolipin Antibody; a $\beta_2$ GPI: anti- a $\beta_2$ Glycoprotein-I Antibody; HCQ: Hydroxychloroquine; *: History of CAPS; **: Also on Amlodipine, Colchicine, and Levothyroxine |            |                              |                            |                                                                   |                         |                         |                                |

### Supplementary Figure. Endothelial Cells in the Peripheral Skin Biopsy Sample of an aPL-Positive Patient without SLE

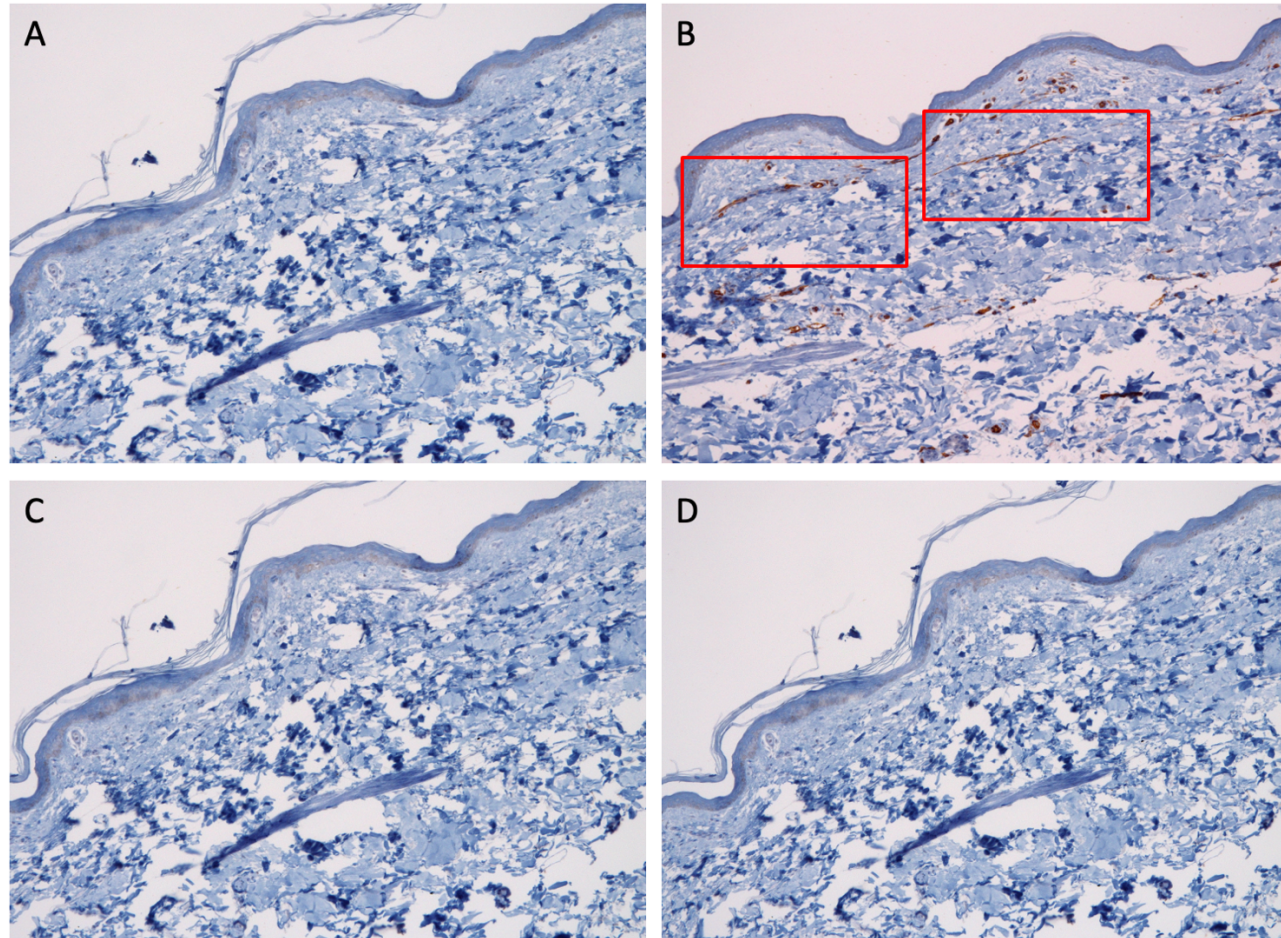

There is increased activity (brown staining/red boxes) of CD31 (B) indicating endothelial cells, but no positive staining of S6RP (A) and AKT (C) for mTOR activation, or Ki-67 (D) for proliferation in the corresponding areas. Images acquired at 10x magnification.

**Supplementary Table S2. Comparison of Ki-67-positive Cell Counts Between Antiphospholipid Antibody (aPL)-positive (with/without lupus) and aPL-negative Lupus Patients**

|                                                                                   | aPL-positive<br>without Lupus<br>(n: 4) | aPL-positive<br>with Lupus<br>(n: 4) | aPL-negative<br>Lupus<br>(n: 2*) |
|-----------------------------------------------------------------------------------|-----------------------------------------|--------------------------------------|----------------------------------|
| <b>Ki-67 Positive cells/Total cells (%)</b>                                       |                                         |                                      |                                  |
| <i>Peripheral</i>                                                                 |                                         |                                      |                                  |
| Upper Surface Layer                                                               | 215/2400 (9)                            | 244/4326 (7)                         | 274/1386 (20)                    |
| Lower Basal Layer                                                                 | 1177/2949(40)                           | 1853/5754(32)                        | 646/1556 (42)                    |
| Total                                                                             | 1392/5349 (26)                          | 2097/10080 (21)                      | 920/2942 (31)                    |
| <i>Central</i>                                                                    |                                         |                                      |                                  |
| Upper Surface Layer                                                               | 114/1493(8)                             | 186/2808 (7)                         | 63/331 (19)                      |
| Lower Basal Layer                                                                 | 714/1838 (39)                           | 1252/3518 (36)                       | 202/422 (48)                     |
| Total                                                                             | 828/3331 (25)                           | 1438/6326 (23)                       | 265/753 (35)                     |
| aPL: Antiphospholipid Antibody; *: only one control sample available for analysis |                                         |                                      |                                  |
